# Supplementary material
Source: publisher figshare collection journal article supplement (https://future-science-group.figshare.com/ndownloader/files/34912800)
Supplement: Supplementary file 1 [file 34912800]

**Patients’ perspectives of a pharmacist-provided clinical pharmacogenomics service**

**Supplementary Data 1**

**Table 1: Genes Included in the OneOme® RightMed® Testing Panel**

| *CYP1A2* | *DPYD* | *MTHFR* |
| --- | --- | --- |
| *CYP2B6* | *DRD2* | *NUDT15* |
| *CYP2C9* | *F2* | *OPRM1* |
| *CYP2C19* | *F5* | *SLC6A4* |
| *CYP2C Cluster rs12777823* | *GRIK4* | *SLCO1B1* |
| *CYP2D6* | *HLA-A* | *TPMT* |
| *CYP3A4* | *HLA-B* | *UGT1A1* |
| *CYP3A5* | *HTR2A* | *VKORC1* |
| *CYP4F2* | *HTR2C* |  |
| *COMT* | *IFNL4* |  |
